# Supplementary material
Source: PubMed Central journal article supplement (PMC7483268)
Supplement: NIHMS1568185-supplement-216_2020_2477_MOESM1_ESM.pdf [file NIHMS1568185-supplement-216_2020_2477_MOESM1_ESM.pdf]

## **Analytical and Bioanalytical Chemistry**

### **Electronic Supplementary Material**

#### **In situ metabolite and lipid analysis of *GluN2D*<sup>-/-</sup> and wild-type mice after ischemic stroke using MALDI MSI**

William T. Andrews, Deborah Donahue, Adam Holmes, Rashna Balsara,  
Francis J. Castellino, Amanda B. Hummon

**Table S1** Analyte that was successfully detected and annotated in knockout control, knockout stroke, wild type control, and wild type stroke mouse brains. Species were detected by MALDI FT-ICR imaging mass spectrometry and were annotated in Metaspace. Asterisk indicates multiple possible annotations within a subclass of molecule

| All Four Conditions |          |              |                              |            |
|---------------------|----------|--------------|------------------------------|------------|
| <i>m/z</i>          | Ion Mode | Brain Region | Annotation                   | Database   |
| 762.6007            | Positive | B            | PC/PE*                       | HMDB-v4    |
| 718.5392            | Negative | B            | PC/PE*                       | HMDB-v4    |
| 782.567             | Positive | B            | PC/PE*                       | HMDB-v4    |
| 784.5827            | Positive | B            | PC/PE*                       | HMDB-v4    |
| 890.6396            | Negative | B            | Ceramide                     | HMDB-v4    |
| 885.5498            | Negative | B            | PI*                          | HMDB-v4    |
| 546.353             | Positive | B            | LysoPC*                      | HMDB-v4    |
| 673.4814            | Negative | B            | PA*                          | HMDB-v4    |
| 459.2482            | Positive | B            | LysoPA*                      | HMDB-v4    |
| 474.1305            | Positive | B            | Dihydronaphthalene*          | PAMDB-v1.0 |
| 697.4779            | Positive | B            | PA*                          | HMDB-v4    |
| 495.1864            | Positive | C            | Doxepin N-oxide glucuronide  | HMDB-v4    |
| 798.5408            | Positive | B            | Docosahexaenoate*            | BraChemDB  |
| 788.5447            | Negative | B            | PS*                          | HMDB-v4    |
| 496.3398            | Positive | B            | LysoPC(16:0)                 | HMDB-v4    |
| 772.5252            | Positive | B            | PE*                          | HMDB-v4    |
| 713.4776            | Positive | C            | 19'-Hexanoyloxymytiloxanthin | HMDB-v4    |
| 497.1936            | Positive | B            | Hydroxystrobilurin D*        | HMDB-v4    |
| 760.5851            | Positive | B/C          | Ethyl phosphate*             | BraChemDB  |
| 558.2576            | Positive | C            | Vignatic acid B              | HMDB-v4    |
| 551.5034            | Positive | B            | Artemoin*                    | HMDB-v4    |
| 744.5549            | Negative | B            | PC/PE*                       | HMDB-v4    |
| 553.1704            | Positive | C            | Cucumerin                    | BraChemDB  |
| 734.5694            | Positive | B/C          | PC/PE*                       | HMDB-v4    |
| 693.1097            | Negative | C            | Guavin B                     | HMDB-v4    |
| 495.1861            | Positive | C            | Oxane-2-carboxylic acid*     | HMDB-v4    |
| 734.5975            | Positive | C            | Aluminum;tetradecanoate      | BraChemDB  |
| 741.5581            | Positive | C            | Menaquinol 8                 | PAMDB-v1.0 |
| 534.2956            | Positive | B            | LysoPC(16:0)                 | HMDB-v4    |
| 404.9958            | Positive | C            | Phosphatidylglycerophosphate | PAMDB-v1.0 |
| 699.497             | Negative | B            | PA*                          | HMDB-v4    |
| 790.5392            | Negative | B            | PC/PE*                       | HMDB-v4    |
| 546.3166            | Positive | C            | PE(10:0/10:0)                | PAMDB-v1.0 |
| 701.5127            | Negative | B            | PA*                          | HMDB-v4    |
| 518.3217            | Positive | B            | LysoPC(16:0)                 | HMDB-v4    |
| 492.9921            | Positive | C            | 2'-Deoxyinosine triphosphate | PAMDB-v1.0 |
| 810.5983            | Positive | B            | PC/PE*                       | HMDB-v4    |
| 647.4657            | Negative | B            | PA*                          | HMDB-v4    |
| 772.5253            | Positive | B            | PC/PE*                       | HMDB-v4    |
| 497.2017            | Positive | C            | Oxynolignan 4-xyloside       | HMDB-v4    |
| 693.0711            | Negative | B            | Oxane-2-carboxylic acid*     | HMDB-v4    |
| 742.5392            | Negative | B            | Phosphinic acid*             | HMDB-v4    |

**Table S2** Annotated species that were detected in knockout control mice after MALDI FT-ICR MSI analysis followed by a metabolite search using Metaspace. Species were only annotated in knockout control mice. Asterisk indicates multiple possible annotations within a subclass of molecule

| Knockout Control Annotations |          |              |                              |            |
|------------------------------|----------|--------------|------------------------------|------------|
| <i>m/z</i>                   | Ion Mode | Brain Region | Annotation                   | Database   |
| 909.5498                     | Negative | B            | PI*                          | HMDB-v4    |
| 794.5705                     | Negative | B            | PC/PE*                       | HMDB-v4    |
| 788.5236                     | Negative | B            | Phosphinic acid*             | BraChemDB  |
| 490.9776                     | Negative | C            | 2'-Deoxyinosine triphosphate | PAMDB-v1.0 |
| 856.5134                     | Negative | B            | Propanoic acid*              | BraChemDB  |
| 822.1341                     | Negative | B            | Propionyl-CoA                | PAMDB-v1.0 |
| 810.529                      | Negative | B            | PS*                          | HMDB-v4    |
| 786.529                      | Negative | B            | Propanoic acid*              | BraChemDB  |
| 835.5342                     | Negative | B            | PI*                          | BraChemDB  |
| 700.565                      | Negative | B            | Dihydrogen phosphate         | BraChemDB  |
| 834.5079                     | Negative | B            | PE                           | HMDB-v4    |
| 417.0639                     | Positive | C            | Sulfonic acid*               | HMDB-v4    |
| 772.5862                     | Negative | B            | Phosphinic acid*             | BraChemDB  |

**Table S3** Annotated species that were detected in knockout stroke mice after MALDI FT-ICR MSI analysis followed by a metabolite search using Metaspace. Species were only annotated in knockout stroke mice. Asterisk indicates multiple possible annotations within a subclass of molecule

| Knockout Stroke Annotations |          |              |                                     |            |
|-----------------------------|----------|--------------|-------------------------------------|------------|
| <i>m/z</i>                  | Ion Mode | Brain Region | Annotation                          | Database   |
| 454.0072                    | Negative | C            | 4-Methylthio-3-butenylglucosinolate | BraChemDB  |
| 693.4701                    | Positive | C            | PG*                                 | PAMDB-v1.0 |
| 707.4858                    | Positive | C            | PG*                                 | PAMDB-v1.0 |
| 806.5705                    | Negative | C            | Ethyl phosphate*                    | BraChemDB  |
| 741.4677                    | Positive | C            | PG*                                 | PAMDB-v1.0 |
| 550.0542                    | Positive | C            | Oxane-2-carboxylate                 | HMDB-v4    |
| 764.5437                    | Positive | C            | Octadecenamide*                     | BraChemDB  |
| 762.5279                    | Positive | C            | PS*                                 | PAMDB-v1.0 |
| 863.2981                    | Positive | C            | Precorrin 2*                        | PAMDB-v1.0 |
| 747.5171                    | Positive | C            | PG*                                 | PAMDB-v1.0 |
| 733.5014                    | Positive | C            | PG*                                 | PAMDB-v1.0 |
| 715.452                     | Positive | C            | PG*                                 | PAMDB-v1.0 |

**Table S4** Annotated species that were detected in wild type control mice after MALDI FT-ICR MSI analysis followed by a metabolite search using Metaspace. Species were only annotated in wild type control mice. Asterisk indicates multiple possible annotations within a subclass of molecule

| Wild Type Control Annotations |          |              |                                        |            |
|-------------------------------|----------|--------------|----------------------------------------|------------|
| <i>m/z</i>                    | Ion Mode | Brain Region | Annotation                             | Database   |
| 741.5307                      | Positive | B            | Palmitoyl sphingomyelin*               | HMDB-v4    |
| 296.0643                      | Positive | B            | 5-Methylcytidine                       | BraChemDB  |
| 459.2272                      | Positive | B            | Methyl stearate                        | BraChemDB  |
| 732.4212                      | Positive | B            | PS*                                    | PAMDB-v1.0 |
| 546.2956                      | Positive | B            | Phosphinic acid*                       | BraChemDB  |
| 562.3269                      | Positive | B            | Trimethylazanium*                      | BraChemDB  |
| 688.395                       | Positive | B            | PE*                                    | PAMDB-v1.0 |
| 826.5723                      | Positive | B            | Ethyl Phosphate*                       | BraChemDB  |
| 800.5566                      | Positive | B            | Ethyl Phosphate*                       | BraChemDB  |
| 506.3252                      | Negative | B            | Phosphinic acid*                       | BraChemDB  |
| 848.6376                      | Positive | B            | Glucosylceramide*                      | HMDB-v4    |
| 564.2487                      | Positive | B            | LysoPE*                                | HMDB-v4    |
| 296.0642                      | Positive | B            | 5-Aminoimidazole ribonucleotide        | PAMDB-v1.0 |
| 568.28                        | Positive | B            | Phosphinic acid*                       | BraChemDB  |
| 723.5113                      | Positive | B            | 2-Octaprenyl-6-methoxy-1,4-benzoquinol | PAMDB-v1.0 |
| 820.5253                      | Positive | B            | Ethyl Phosphate*                       | BraChemDB  |
| 525.9702                      | Negative | B            | dATP                                   | PAMDB-v1.0 |
| 560.3113                      | Positive | B            | LysoPC*                                | HMDB-v4    |

**Table S5** Annotated species that were detected in wild type stroke mice after MALDI FT-ICR MSI analysis followed by a metabolite search using Metaspacer. Species were only annotated in wild type stroke mice. Asterisk indicates multiple possible annotations within a subclass of molecule

| Wild Type Stroke Annotations |          |              |                                            |            |
|------------------------------|----------|--------------|--------------------------------------------|------------|
| <i>m/z</i>                   | Ion Mode | Brain Region | Annotation                                 | Database   |
| 520.3398                     | Positive | B            | LysoPC*                                    | BraChemDB  |
| 711.1203                     | Negative | B            | 2",6"-Digalloyliriflophenone 3-C-glucoside | HMDB-v4    |
| 702.4316                     | Positive | B            | PS*                                        | PAMDB-v1.0 |
| 689.3436                     | Negative | C            | PGP(12:0/12:0)                             | PAMDB-v1.0 |
| 872.6386                     | Negative | B            | PS*                                        | HMDB-v4    |
| 510.3554                     | Positive | B            | Phosphinic acid*                           | BraChemDB  |
| 457.2326                     | Positive | B            | Phosphonic acid                            | BraChemDB  |
| 591.4959                     | Positive | B            | DG*                                        | PAMDB-v1.0 |
| 615.4959                     | Positive | B            | DG*                                        | PAMDB-v1.0 |
| 754.5357                     | Positive | B            | PE*                                        | PAMDB-v1.0 |
| 741.5007                     | Positive | B            | 2-Demethylmenaquinone 8                    | PAMDB-v1.0 |
| 590.1147                     | Positive | C            | Phosphinic acid*                           | BraChemDB  |
| 415.222                      | Positive | B            | Methyl palmitate                           | BraChemDB  |
| 613.4802                     | Positive | B            | DG*                                        | HMDB-v4    |
| 716.4473                     | Positive | B            | PS*                                        | PAMDB-v1.0 |
| 837.682                      | Positive | B            | Trimethylazanium                           | BraChemDB  |
| 809.6507                     | Positive | B            | Trimethylazanium*                          | BraChemDB  |
| 607.0847                     | Positive | B            | Cinnamoyl-galloyl-querctin*                | BraChemDB  |
| 409.3441                     | Positive | B            | 5alpha-Cholestanone*                       | BraChemDB  |
| 812.5201                     | Positive | B            | PE(22:5(7Z,10Z,13Z,16Z,19Z)/18:2(9Z,12Z))  | PAMDB-v1.0 |
| 575.5034                     | Positive | B            | Montecristin                               | HMDB-v4    |
| 423.3233                     | Positive | B            | 25-Hydroxytachysterol3*                    | BraChemDB  |

**Table S6** All possible annotations for phosphatidylinositol species obtained by searching MALDI-MSI data for knockout control, knockout stroke, wild type control, and wild type stroke mouse brains against the Human Metabolome Database using Metaspace

| Phosphatidylinositols              |          |                                |
|------------------------------------|----------|--------------------------------|
| <i>m/z</i>                         | Polarity | Annotation                     |
| 885.5498                           | Negative | PI(16:0/22:4(10Z,13Z,16Z,19Z)) |
|                                    |          | PI(16:0/22:4(7Z,10Z,13Z,16Z))  |
|                                    |          | PI(18:0/20:4(5Z,8Z,11Z,14Z))   |
|                                    |          | PI(18:0/20:4(8Z,11Z,14Z,17Z))  |
|                                    |          | PI(18:1(11Z)/20:3(5Z,8Z,11Z))  |
|                                    |          | PI(18:1(11Z)/20:3(8Z,11Z,14Z)) |
|                                    |          | PI(18:1(9Z)/20:3(5Z,8Z,11Z))   |
|                                    |          | PI(18:1(9Z)/20:3(8Z,11Z,14Z))  |
|                                    |          | PI(18:2(9Z,12Z)/20:2(11Z,14Z)) |
|                                    |          | PI(20:2(11Z,14Z)/18:2(9Z,12Z)) |
|                                    |          | PI(20:3(5Z,8Z,11Z)/18:1(11Z))  |
|                                    |          | PI(20:3(5Z,8Z,11Z)/18:1(9Z))   |
|                                    |          | PI(20:3(8Z,11Z,14Z)/18:1(11Z)) |
|                                    |          | PI(20:3(8Z,11Z,14Z)/18:1(9Z))  |
|                                    |          | PI(20:4(5Z,8Z,11Z,14Z)/18:0)   |
|                                    |          | PI(20:4(8Z,11Z,14Z,17Z)/18:0)  |
|                                    |          | PI(22:4(10Z,13Z,16Z,19Z)/16:0) |
|                                    |          | PI(22:4(7Z,10Z,13Z,16Z)/16:0)  |
| 857.5185                           | Negative | PI(16:0/20:4(5Z,8Z,11Z,14Z))   |
|                                    |          | PI(16:0/20:4(8Z,11Z,14Z,17Z))  |
|                                    |          | PI(18:1(11Z)/18:3(6Z,9Z,12Z))  |
|                                    |          | PI(18:1(11Z)/18:3(9Z,12Z,15Z)) |
|                                    |          | PI(18:1(9Z)/18:3(6Z,9Z,12Z))   |
|                                    |          | PI(18:1(9Z)/18:3(9Z,12Z,15Z))  |
|                                    |          | PI(18:2(9Z,12Z)/18:2(9Z,12Z))  |
|                                    |          | PI(18:3(6Z,9Z,12Z)/18:1(11Z))  |
|                                    |          | PI(18:3(6Z,9Z,12Z)/18:1(9Z))   |
|                                    |          | PI(18:3(9Z,12Z,15Z)/18:1(11Z)) |
|                                    |          | PI(18:3(9Z,12Z,15Z)/18:1(9Z))  |
|                                    |          | PI(20:4(5Z,8Z,11Z,14Z)/16:0)   |
|                                    |          | PI(20:4(8Z,11Z,14Z,17Z)/16:0)  |
|                                    |          | 883.5342                       |
| PI(16:0/22:5(7Z,10Z,13Z,16Z,19Z))  |          |                                |
| PI(16:2(9Z,12Z)/22:3(10Z,13Z,16Z)) |          |                                |
| PI(18:1(11Z)/20:4(5Z,8Z,11Z,14Z))  |          |                                |
| PI(18:1(11Z)/20:4(8Z,11Z,14Z,17Z)) |          |                                |
| PI(18:1(9Z)/20:4(5Z,8Z,11Z,14Z))   |          |                                |

|          |          |                                        |
|----------|----------|----------------------------------------|
|          |          | PI(18:1(9Z)/20:4(8Z,11Z,14Z,17Z))      |
|          |          | PI(18:2(9Z,12Z)/20:3(5Z,8Z,11Z))       |
|          |          | PI(18:2(9Z,12Z)/20:3(8Z,11Z,14Z))      |
|          |          | PI(20:3(5Z,8Z,11Z)/18:2(9Z,12Z))       |
|          |          | PI(20:3(8Z,11Z,14Z)/18:2(9Z,12Z))      |
|          |          | PI(20:4(5Z,8Z,11Z,14Z)/18:1(11Z))      |
|          |          | PI(20:4(5Z,8Z,11Z,14Z)/18:1(9Z))       |
|          |          | PI(20:4(8Z,11Z,14Z,17Z)/18:1(11Z))     |
|          |          | PI(20:4(8Z,11Z,14Z,17Z)/18:1(9Z))      |
|          |          | PI(22:3(10Z,13Z,16Z)/16:2(9Z,12Z))     |
|          |          | PI(22:5(4Z,7Z,10Z,13Z,16Z)/16:0)       |
|          |          | PI(22:5(7Z,10Z,13Z,16Z,19Z)/16:0)      |
| 835.5342 | Negative | PI(16:0/18:1(11Z))                     |
|          |          | PI(16:0/18:1(9Z))                      |
|          |          | PI(16:1(9Z)/18:0)                      |
|          |          | PI(18:0/16:1(9Z))                      |
|          |          | PI(18:1(11Z)/16:0)                     |
|          |          | PI(18:1(9Z)/16:0)                      |
| 909.5498 | Negative | PI(18:0/22:6(4Z,7Z,10Z,13Z,16Z,19Z))   |
|          |          | PI(18:3(6Z,9Z,12Z)/22:3(10Z,13Z,16Z))  |
|          |          | PI(18:3(9Z,12Z,15Z)/22:3(10Z,13Z,16Z)) |
|          |          | PI(20:3(5Z,8Z,11Z)/20:3(5Z,8Z,11Z))    |
|          |          | PI(20:3(5Z,8Z,11Z)/20:3(8Z,11Z,14Z))   |
|          |          | PI(20:3(8Z,11Z,14Z)/20:3(5Z,8Z,11Z))   |
|          |          | PI(20:3(8Z,11Z,14Z)/20:3(8Z,11Z,14Z))  |
|          |          | PI(22:3(10Z,13Z,16Z)/18:3(6Z,9Z,12Z))  |
|          |          | PI(22:3(10Z,13Z,16Z)/18:3(9Z,12Z,15Z)) |
|          |          | PI(22:6(4Z,7Z,10Z,13Z,16Z,19Z)/18:0)   |

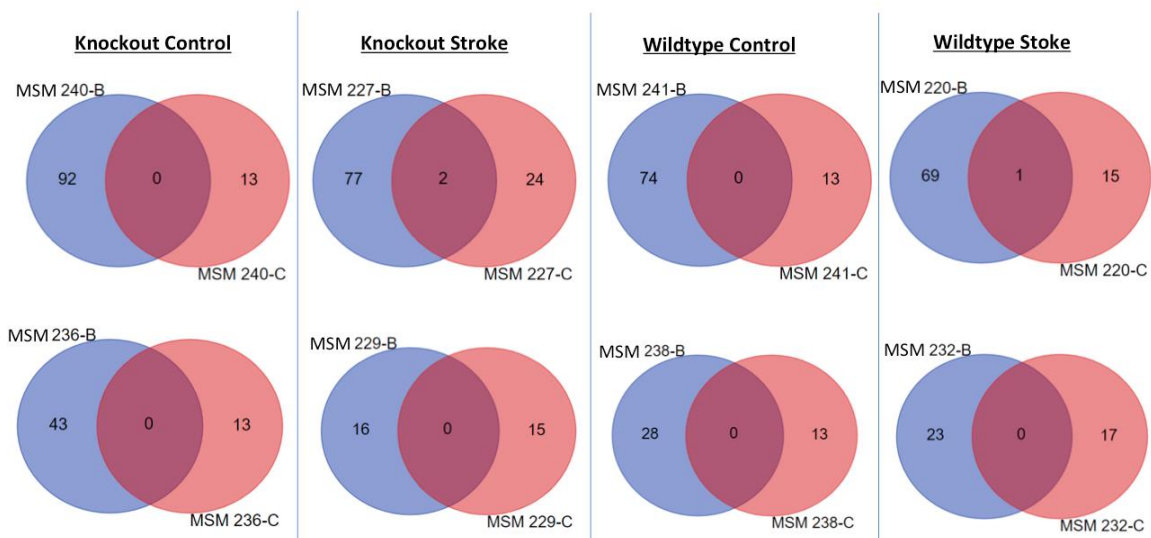

**Fig. S1** Comparison of annotations obtained from B and C regions of mouse brain sections using Metaspace. Metaspace annotations obtained from data in both positive and negative MALDI MSI data were combined and compared with annotations from a different region of the same mouse brain. Knockout stroke mice shared  $m/z$  734.5694 (PE) and 760.5851 (PE), while wild type stroke mice shared  $m/z$  756.5514 (PE). MALDI MSI analysis was conducted using a 15T FT-ICR mass spectrometer with a mass window of  $\pm 10$  mDa



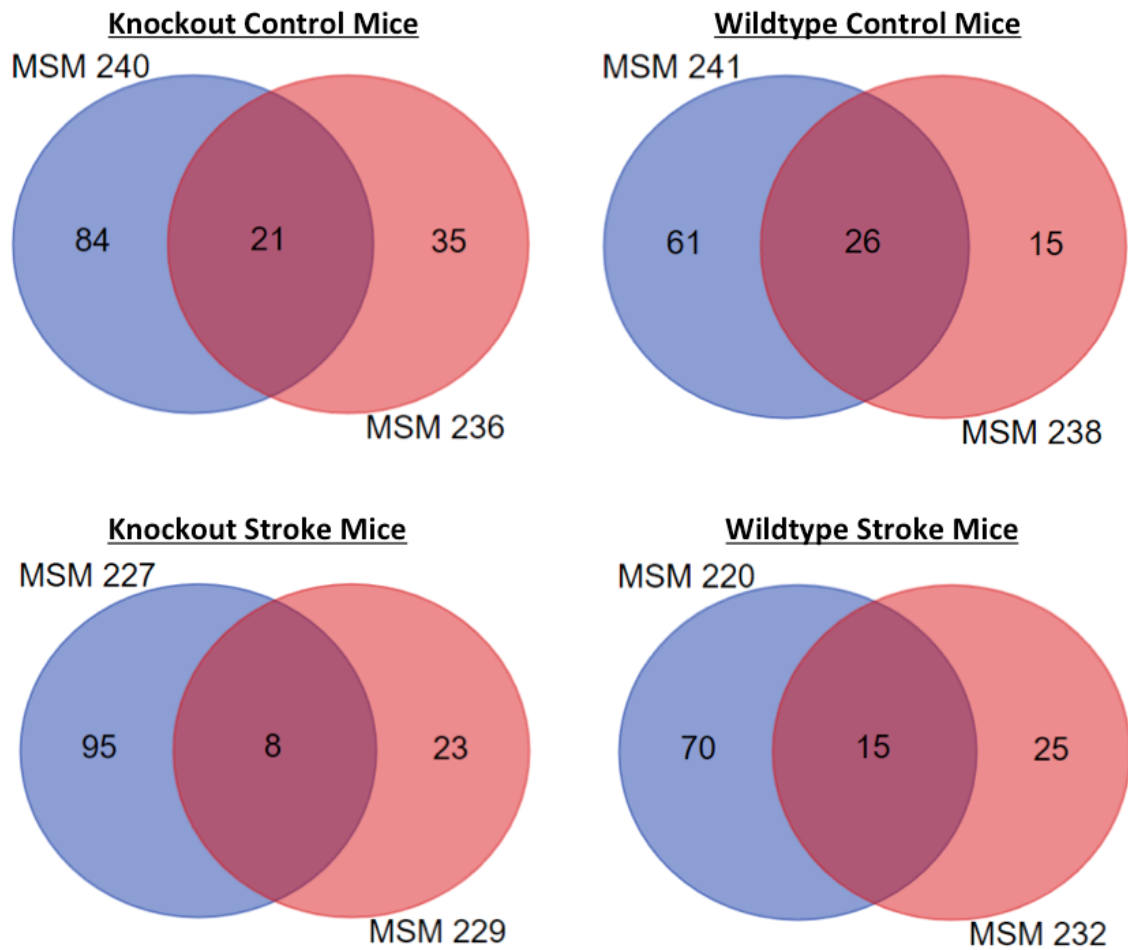

**Fig. S2** Comparison of annotations obtained from knockout control, knockout stroke, wild type control, and wild type stroke mouse brain sections using Metaspace. Metaspace annotations obtained from data in both positive and negative MALDI MSI data from B and C regions of the brain were combined and compared with annotations from a different mouse of the same cohort. MALDI MSI analysis was conducted using a 15T FT-ICR mass spectrometer with a mass window of  $\pm 10$  mDa

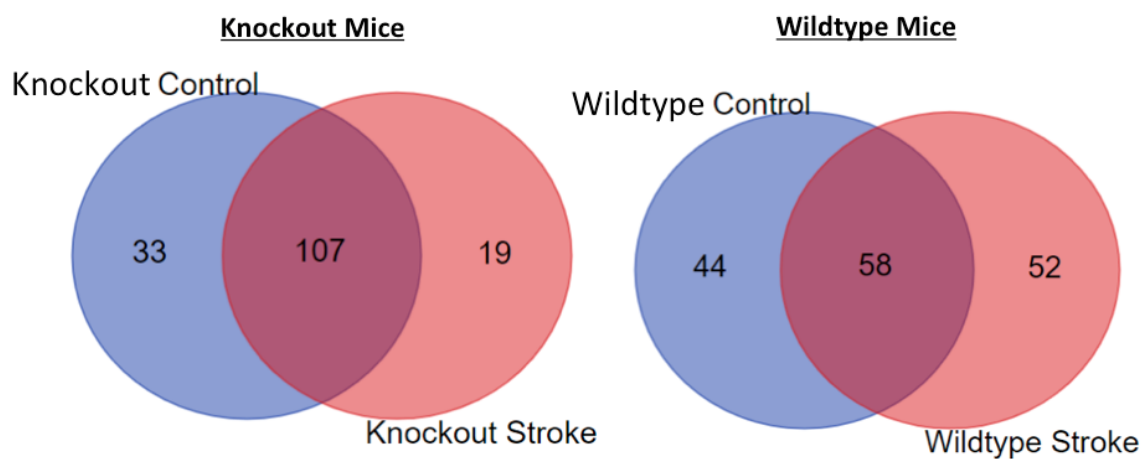

**Fig. S3** Comparison of annotations obtained from knockout wild type mouse brain sections using Metaspacer. Metaspacer annotations obtained from data in both positive and negative MALDI MSI data from B and C regions of the brain from mice of each cohort were combined and compared with annotations from mice of a different cohort with the same genotype. MALDI MSI analysis was conducted using a 15T FT-ICR mass spectrometer with a mass window of  $\pm 10$  mDa

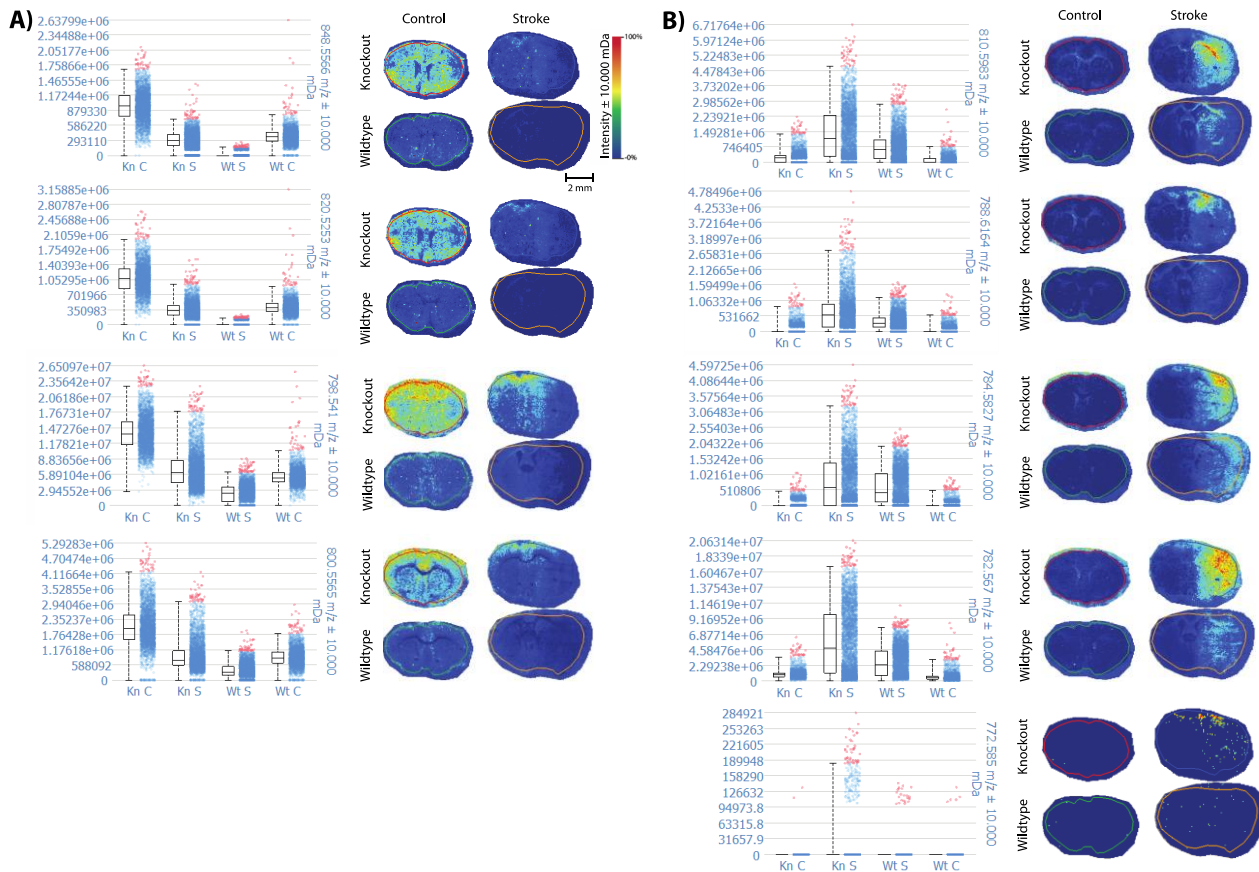

**Fig. S4** MALDI MSI ion heat maps and intensity plots for PC species in wild type and knockout mice that had and had not undergone ischemic stroke. All PC species displayed above appeared more intense in knockout mice when compared to wildtype. a) Four PC species appeared more intense in knockout control mice, while b) five PC species appeared more intense in knockout stroke mice. MALDI MSI analysis was conducted using a 15T FT-ICR mass spectrometer with a mass window of  $\pm 10$  mDa

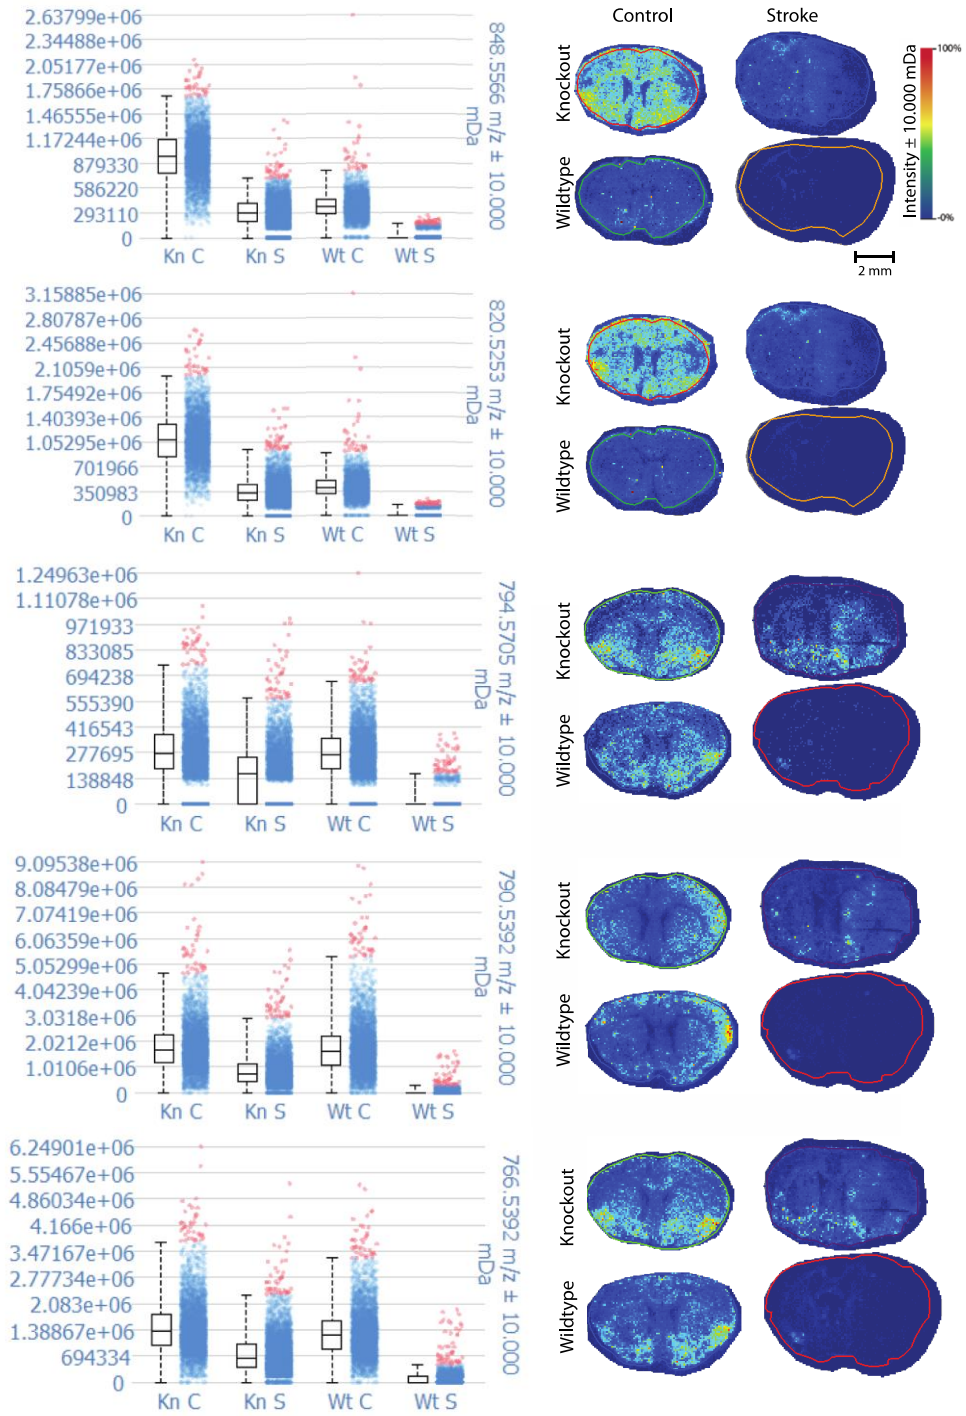

**Fig. S5** MALDI MSI ion heat maps for PC species that are less abundant in wild type stroke mouse brains when compared to the other three conditions. MALDI MSI analysis was conducted using a 15T FT-ICR mass spectrometer with a mass window of  $\pm 10$  mDa
